# Supplementary material for: CDK-mediated phosphorylation of PNKP is required for end-processing of single-strand DNA gaps on Okazaki fragments and genome stability
Source: eLife journal article supplement (doi:10.7554/elife.99217), 2025-03-12
Supplement: fig3-figsupp1-data3 [file elife-99217-fig3-figsupp1-data3-v1.pdf]

## Figure 3-figure supplement B

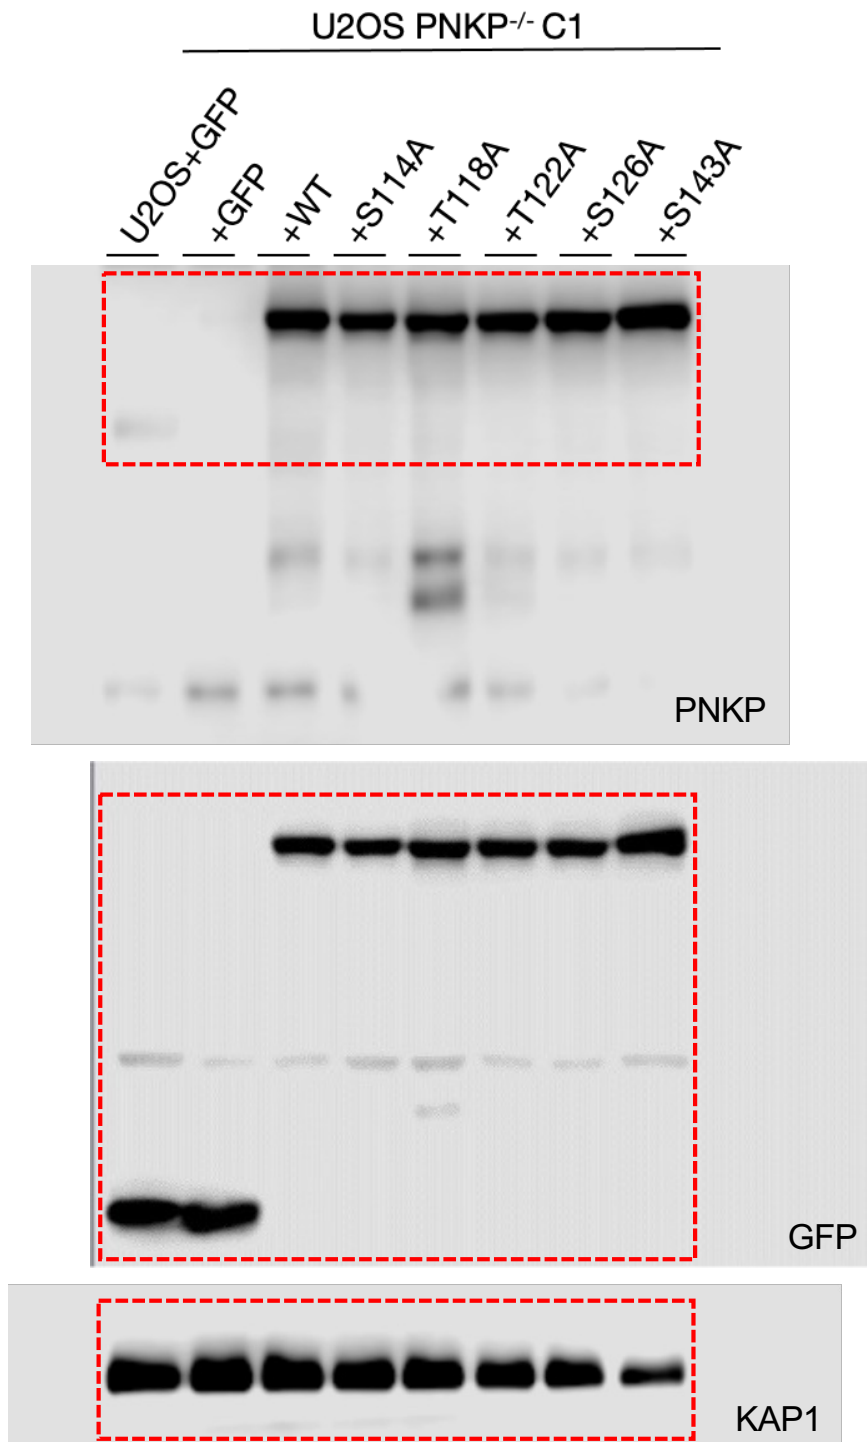

### Figure 3-figure supplement B-Source Data 1.

Original membranes corresponding to Figure 3-figure supplement, panel B. Regions surrounded with red dashed line represent cropped areas, respectively. Annotations represent employed antibodies, respectively.
