# Supplementary material for: CDK-mediated phosphorylation of PNKP is required for end-processing of single-strand DNA gaps on Okazaki fragments and genome stability
Source: eLife journal article supplement (doi:10.7554/elife.99217), 2025-03-12
Supplement: fig4-data7 [file elife-99217-fig4-data7-v1.pdf]

Figure 4D

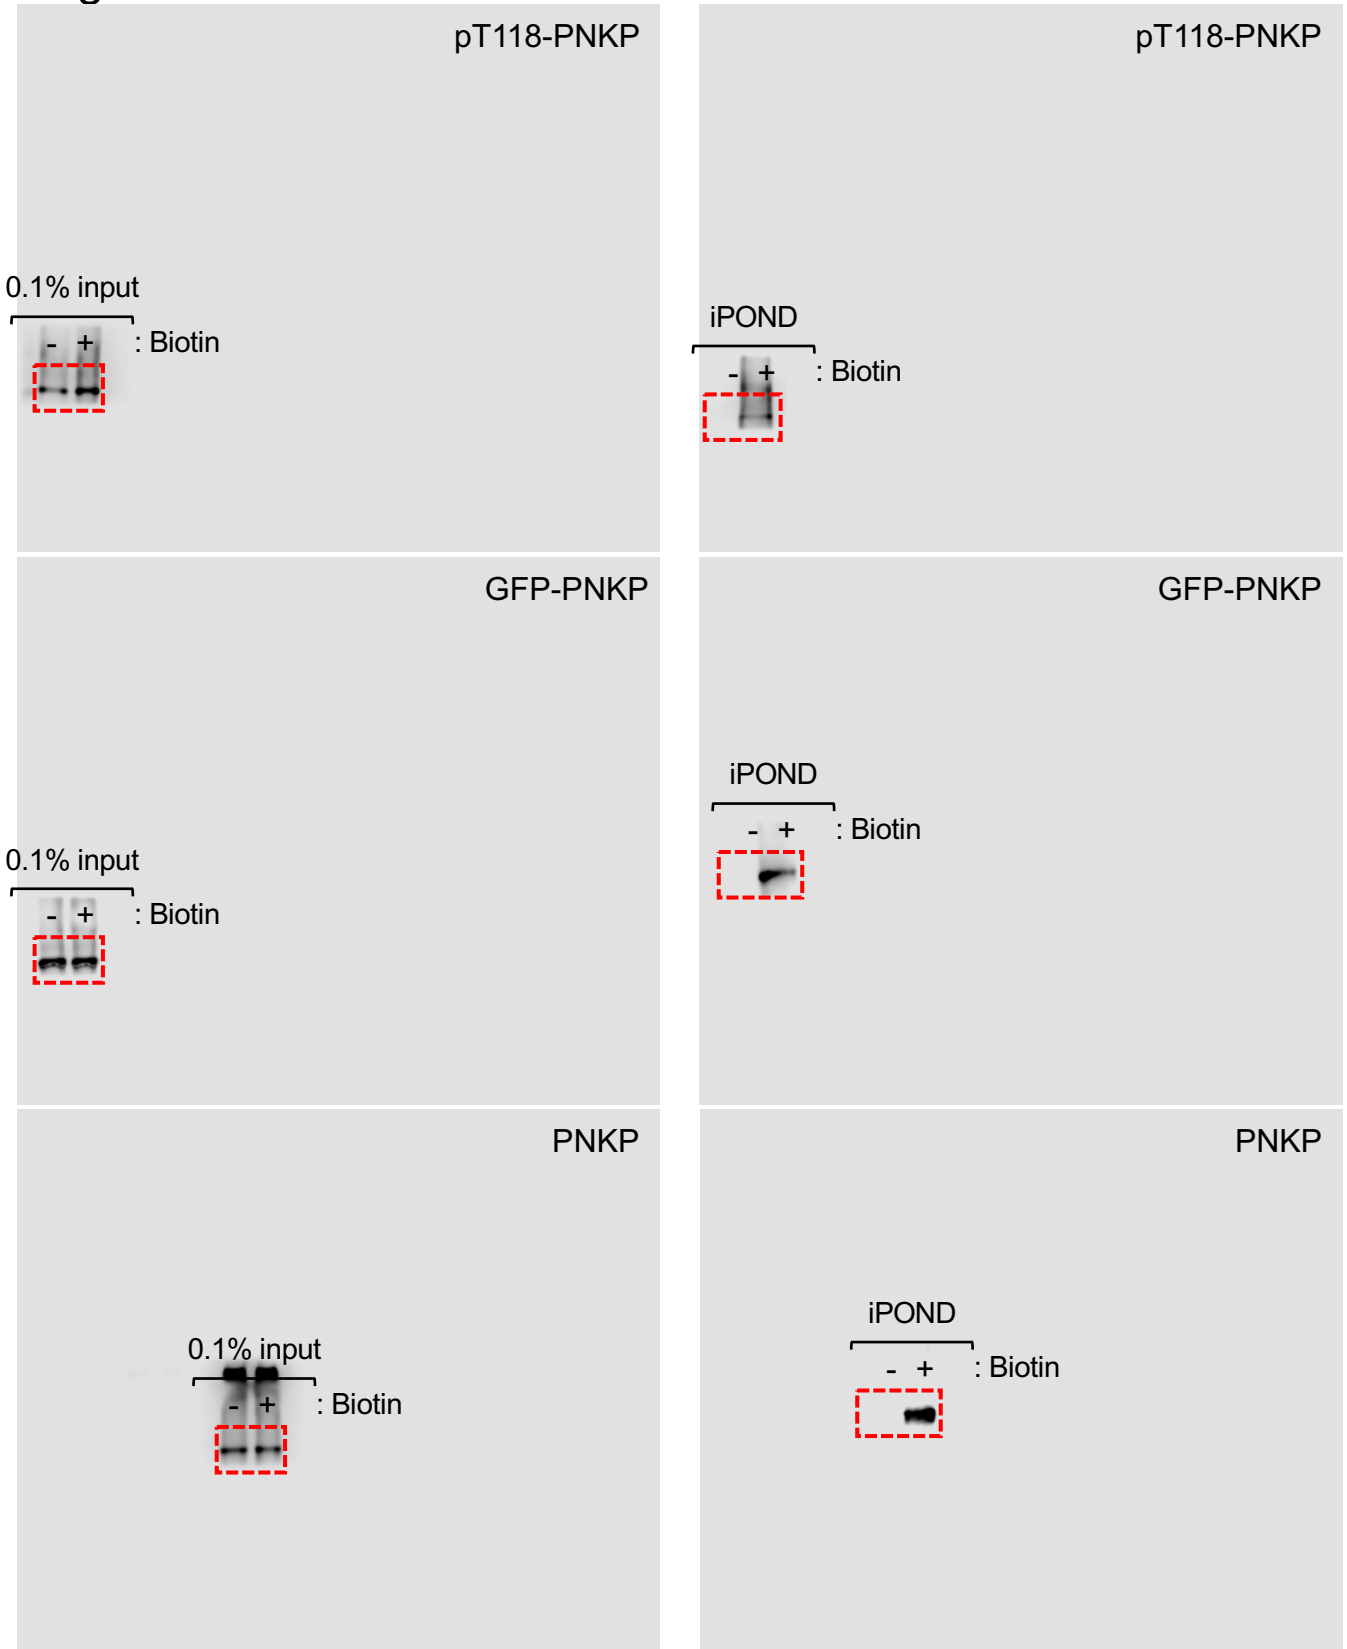**Figure 4D-Source Data 1.**

Original membranes corresponding to Figure 4, panel D. Regions surrounded with red dashed line represent cropped areas, respectively. Annotations represent employed antibodies, respectively.

Figure 4D

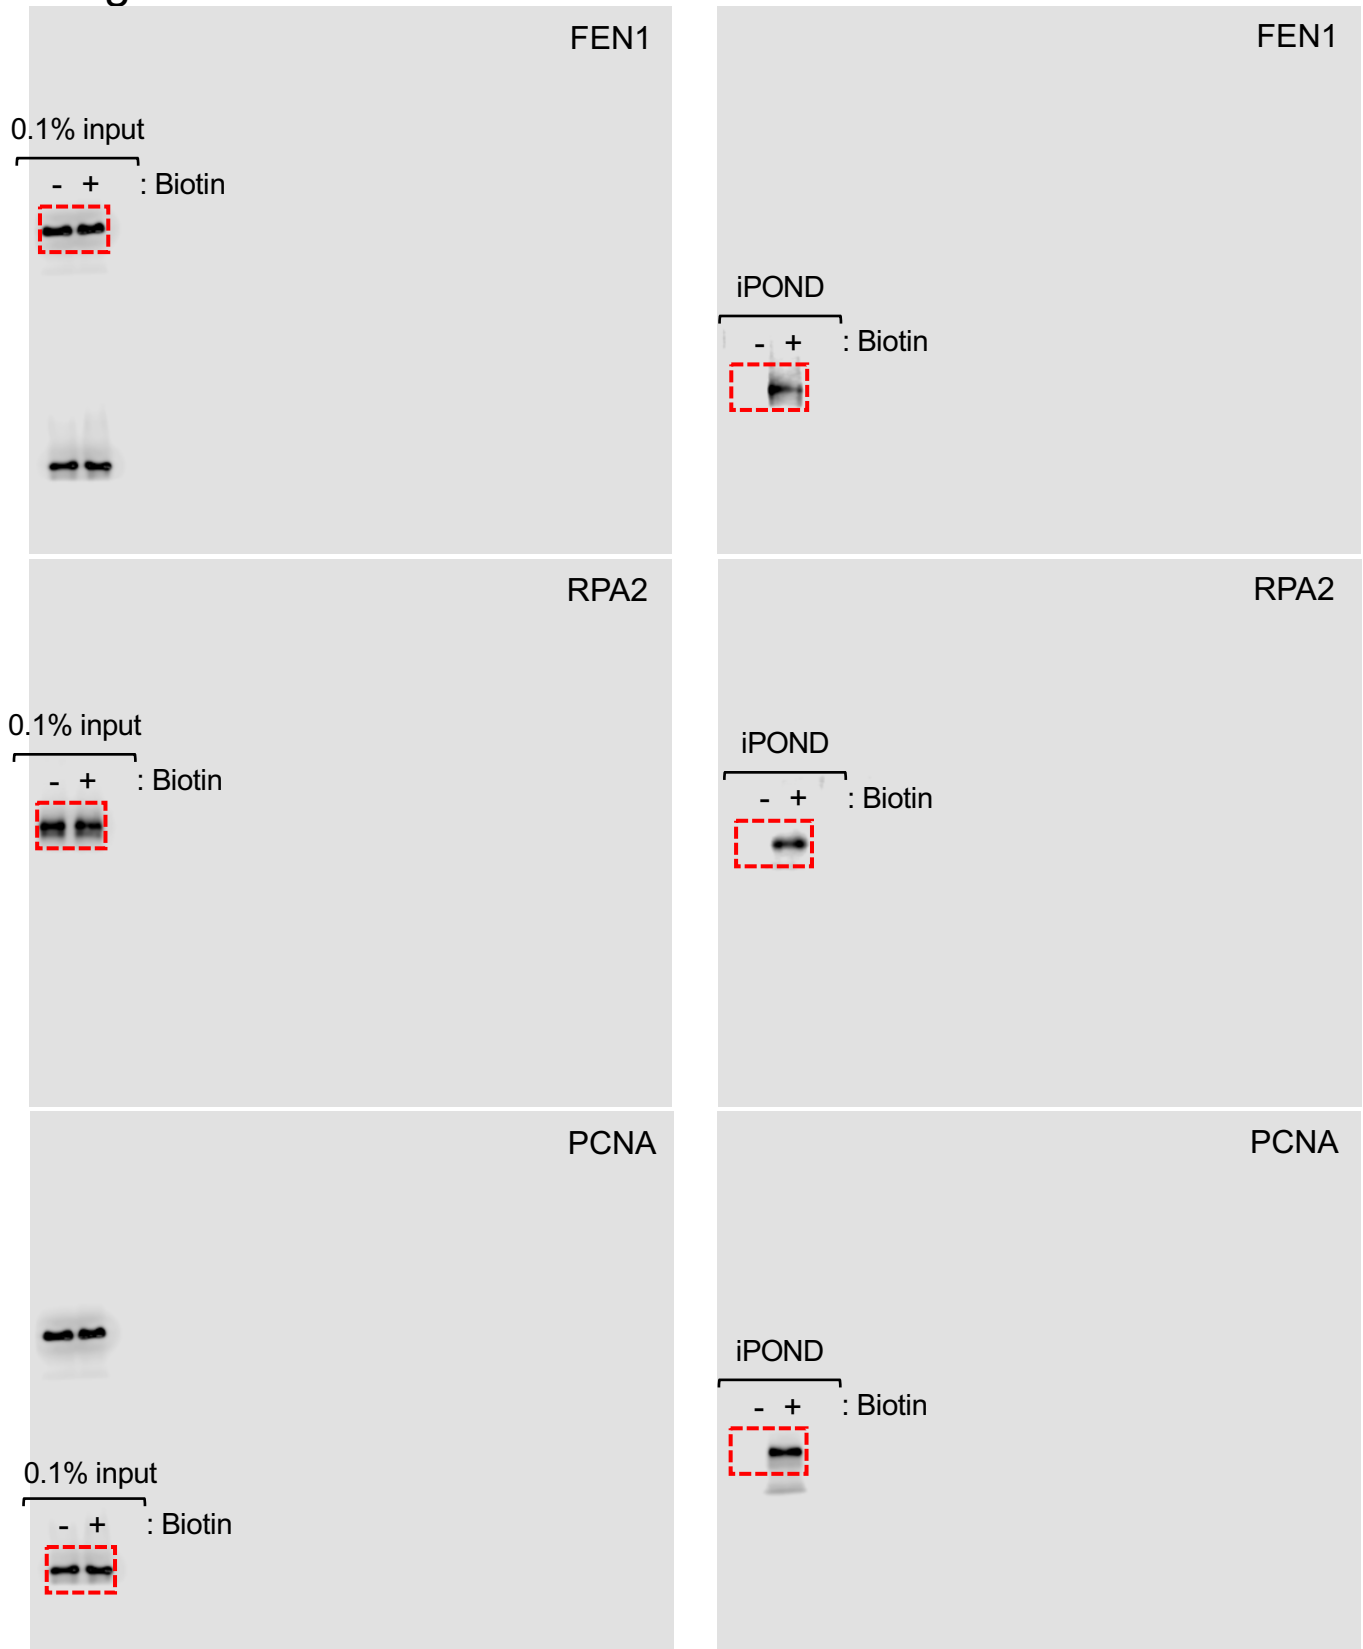**Figure 4D-Source Data 1.**

Original membranes corresponding to Figure 4, panel D. Regions surrounded with red dashed line represent cropped areas, respectively. Annotations represent employed antibodies, respectively.
