# Supplementary material for: CDK-mediated phosphorylation of PNKP is required for end-processing of single-strand DNA gaps on Okazaki fragments and genome stability
Source: eLife. 2025 Mar 27;14:e99217. doi: 10.7554/eLife.99217 (PMC11949490; doi:10.7554/eLife.99217)
Supplement: Supplementary file 1. — Sequences of DNA oligonucleotide primers for mutagenesis of PNKP. ‘F’ and ‘R’ indicate forward and reverse sequences, respectively. [file elife-99217-supp1.xlsx]

## Sheet: Sheet1
	Supplementary table 1 Sequences of DNA oligonucleotide primers for mutagenesis of PNKP. “F” and “R” indicate forward and reverse sequences, respectively.
	Name		DNA sequences
	D1	F	CGGACTCAGATCTATGACACCAGAATCCCAGC
		R	GCTGGGATTCTGGTGTCATAGATCTGAGTCCG
	D2	F	GGGAAGAGACCCGCGGCTGGGAGAACTT
		R	AAGTTCTCCCAGCCGCGGGTCTCTTCCC
	D3	F	GCGGAAGTCAAACCCCCTCCCAGCCTTTGATC
		R	GATCAAAGGCTGGGAGGGGGTTTGACTTCCGC
	D4	F	CAGCCGGCTTCGAGTGAGTCGACGGTAC
		R	GTACCGTCGACTCACTCGAAGCCGGCTG
	R35A	F	CCTGGTCCTGGGCGCGGGACCCCTGACC
		R	GGTCAGGGGTCCCGCGCCCAGGACCAGG
	R48A	F	GGACCGGAAGTGCTCCGCAACTCAAGTGGAGCTG
		R	CAGCTCCACTTGAGTTGCGGAGCACTTCCGGTCC
	S114A	F	GACCCGCACACCAGAAGCCCAGCCAGA
		R	TCTGGCTGGGCTTCTGGTGTGCGGGTC
	S114D	F	AGACCCGCACACCAGAAGACCAGCCAGATACTCC
		R	GGAGTATCTGGCTGGTCTTCTGGTGTGCGGGTCT
	T118A	F	CCAGAATCCCAGCCAGATGCTCCGCCTGG
		R	CCAGGCGGAGCATCTGGCTGGGATTCTGG
	T118D	F	CACCAGAATCCCAGCCAGATGATCCGCCTGGCAC
		R	GTGCCAGGCGGATCATCTGGCTGGGATTCTGGTG
	T122A	F	CTCCGCCTGGCGCCCCTCTGGTG
		R	CACCAGAGGGGCGCCAGGCGGAG
	S126A	F	GCACCCCTCTGGTGGCCCAAGATGAGAAG
		R	CTTCTCATCTTGGGCCACCAGAGGGGTGC
	S143A	F	GCGTATGCGGAAGGCAAACCCCGGCTG
		R	CAGCCGGGGTTTGCCTTCCGCATACGC
	D171A	F	GTGGCTGGCTTTGCTCTGGACGGGACG
		R	CGTCCCGTCCAGAGCAAAGCCAGCCAC
	K378A	F	CCCTGGGGCCGGGGCGTCCACCTTTCTC
		R	GAGAAAGGTGGACGCCCCGGCCCCAGGG
