# Supplementary material for: CDK-mediated phosphorylation of PNKP is required for end-processing of single-strand DNA gaps on Okazaki fragments and genome stability
Source: eLife. 2025 Mar 27;14:e99217. doi: 10.7554/eLife.99217 (PMC11949490; doi:10.7554/eLife.99217)
Supplement: Supplementary file 2. — Oligonucleotide sequences of siRNAs for specific depletion with indicated proteins. [file elife-99217-supp2.xlsx]

## Sheet: Sheet1
	Supplementary table 2 Oligonucleotide sequences of siRNAs for specific depletion with indicated proteins.
	Name		Oligonucleotides	Target site (5'-3')
	siLUC	Sense		TAAGGCTATGAAGAGATAC Dharmacon, cat# D-001210-02-20
		Anti-sense
	siPNKP 3'-UTR Ver.1	Sense	CACAAUAAACGCUGUUUCUCC	CACAATAAACGCTGTTTCTCC
		Anti-sense	AGAAACAGCGUUUAUUGUGGA
	siPNKP 3'-UTR Ver.2	Sense	ACAAUAAACGCUGUUUCUCCUUG	ACAATAAACGCTGTTTCTCCTTG
		Anti-sense	AGGAGAAACAGCGUUUAUUGUGG
	siXRCC1	Sense	GGCAGACACUUACCGAAAAUG	GGCAGACACTTACCGAAAA
		Anti-sense	UUUUCGGUAAGUGUCUGCCUU
